# Supplementary material
Source: publisher site journal article supplement (https://www.spandidos-publications.com/218/downloadSupplementary)

Figure S1. Venn diagram of co-DEGs between TCGA and GEO samples. Total co-DEGs were identified in TCGA and GEO samples for (A) female and (B) male subjects. (C) Co-DEGs were presented as female only, male only or shared. DEG, differentially expressed gene; GEO, Gene Expression Omnibus; TCGA, The Cancer Genome Atlas.

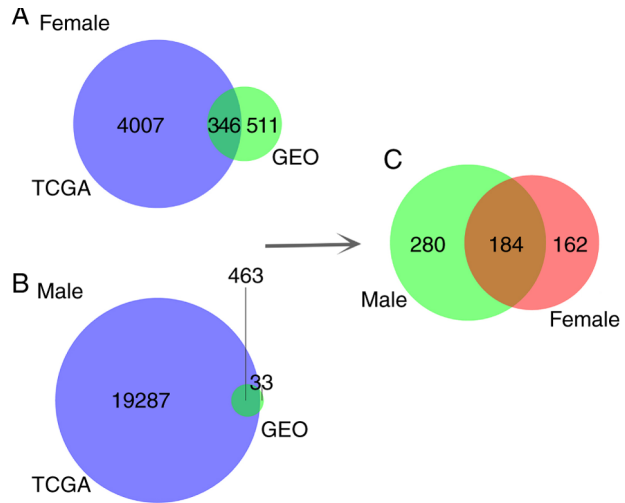

Supplement: Supplementary file 1 [file downloadSupplementary]
